# Supplementary material
Source: PubMed Central journal article supplement (PMC7934074)
Supplement: jamaoncol-e210006-s003.pdf [file jamaoncol-e210006-s003.pdf]

## Supplementary Online Content

Javle M, Shacham-Shmueli E, Xiao L, et al. Olaparib monotherapy for previously treated pancreatic cancer with DNA damage repair genetic alterations other than germline *BRCA* variants: findings from 2 phase 2 nonrandomized clinical trials. *JAMA Oncol*. Published online March 4, 2021. doi:10.1001/jamaoncol.2021.0006

**eFigure 1.** Kaplan Meier Survival Curve for PFS Based on DDR-GA

**eFigure 2.** Kaplan Meier Survival Curve for PFS Based on Platinum Sensitivity

**eTable 1A.** Patient Demographics

**eTable 1B.** Gene List

**eTable 2A.** Distribution of Cases at Sheba Medical Center and MD Anderson Cancer Center

**eTable 2B.** Univariate Cox Model to Evaluate Risk Effect of DDR-GA vs ATM loss, FH or PH on PFS

**eTable 3A.** Log Rank Test to Compare OS Between Subgroups of Patients

**eTable 3B.** Univariate Cox Model to Evaluate Risk Effect of DDR-GA vs ATM loss, HF or PH on PFS

**eTable 4.** Summary of Adverse Events and Grade

This supplementary material has been provided by the authors to give readers additional information about their work.

**eFigure 1.** Kaplan Meier Survival Curve for PFS Based on DDR-GA

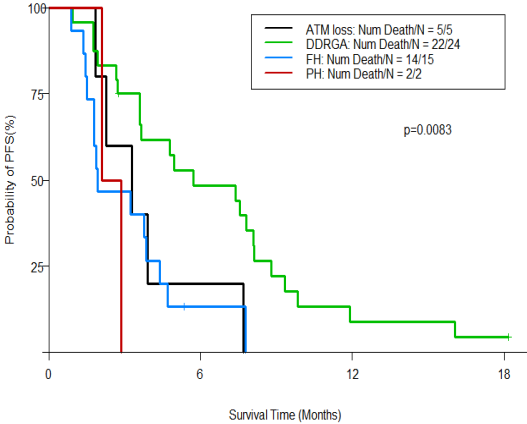

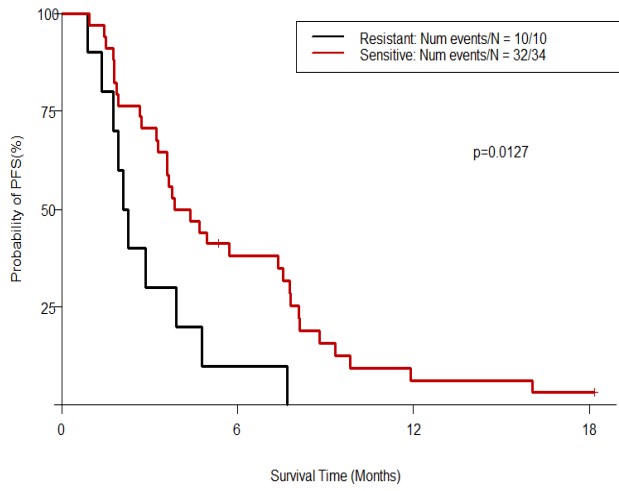

**eFigure 2.** Kaplan Meier Survival Curve for PFS Based on Platinum Sensitivity

**eTable 1A. Patient Demographics**

| Characteristic                        | MDACC (N=22)      | Sheba (N=24)        | Fisher's exact test p value |
|---------------------------------------|-------------------|---------------------|-----------------------------|
|                                       | n (%)             | n (%)               |                             |
| <b>Gender</b>                         |                   |                     |                             |
| M                                     | 10 (45.5%)        | 10 (41.7%)          | 1                           |
| F                                     | 12 (54.5%)        | 14 (58.3%)          |                             |
| <b>ECOG PS</b>                        |                   |                     |                             |
| 0                                     | 8 (36.4%)         | 18 (75%)            | 0.016                       |
| 1                                     | 14 (63.6%)        | 6 (25%)             |                             |
| <b>Site of primary in pancreas</b>    |                   |                     |                             |
| Head                                  | 9 (40.9%)         | 13 (54.2%)          | 0.39                        |
| Body                                  | 7 (31.8%)         | 6 (25%)             | 0.75                        |
| Tail                                  | 7 (31.8%)         | 6 (25%)             | 0.75                        |
| Overlapping                           | 5 (22.7%)         | 1 (4.2%)            | 0.09                        |
| <b>Sites of metastases</b>            |                   |                     |                             |
| Liver                                 | 13 (59.1%)        | 15 (62.5%)          | 1                           |
| Peritoneum                            | 15 (68.2%)        | 8 (33.3%)           | 0.038                       |
| Lung                                  | 6 (27.3%)         | 6 (25%)             | 1                           |
| Others                                | 5 (22.7%)         | 5 (20.8%)           | 1                           |
| <b>Prior therapy type</b>             |                   |                     |                             |
| Gem/nab paclitaxel                    | 9 (40.9%)         | 4 (16.7%)           | 0.1                         |
| Folfirinox                            | 15 (68.1%)        | 19 (79.2%)          | 0.51                        |
| Gem/cisplatin                         | 2 (9.1%)          | 3 (12.5%)           | 1                           |
| FOLFIRI                               | 5 (22.7%)         | 2 (8.3%)            | 0.23                        |
| FOLFOX                                | 2 (9.1%)          | 1 (4.2%)            | 0.6                         |
| Gemcitabine (single agent)            | 4 (18.2%)         | 5 (20.8%)           | 1                           |
| Others:                               | 8 (36.4%)         | 4 (16.7%)           | 0.18                        |
| <b>Wilcoxon rank sum test p value</b> |                   |                     |                             |
|                                       | Median (range)    | Median (range)      |                             |
| Age                                   | 62 (46 - 89)      | 68 (35-86)          | 0.19                        |
| Baseline CA 19-9                      | 109.2 (<1->10000) | 351.35 (0.8, 16582) | 0.89                        |
| Prior treatment lines                 | 2 (1-5)           | 2 (1-4)             | 0.1                         |

**eTable 1B.** Gene List

| Subjects | Gene and Location                            | Somatic vs germline |
|----------|----------------------------------------------|---------------------|
| 1        | ATM L1042fs*2, S2812fs*3<br>ARID1A L1922fs*1 | Somatic             |
| 2        | BRCA2 K3326X<br>ATM K2756X                   | Somatic             |
| 3        | ATM R3008C, R3008H                           | Somatic             |
| 4        | ATM R23*                                     | Germline            |
| 5        | ATM G2695D                                   | Somatic             |
| 6        | PALB2 Tyr1183*                               | Germline            |
| 7        | PALB2 P924R                                  | Germline            |
| 8        | ATM Q2762*                                   | Somatic             |
| 9        | ATM Arg1875                                  | Germline            |
| 10       | RAD 51C                                      | Germline            |
| 11       | ATM Arg447                                   | Germline            |
| 12       | ATM A1299fs                                  | Somatic             |
| 13       | ARID1A D1850fs*4                             | Somatic             |
| 14       | ATM c4776+1G>T                               | Germline            |
| 15       | ATM L2307F                                   | Somatic             |
| 16       | ATM c.2248delCT                              | Germline            |
| 17       | FANCB D850E                                  | Somatic             |
| 18       | PTEN T277K                                   | Somatic             |
| 19       | ATM D1853N                                   | Somatic             |
| 20       | ATM C.2573_2574delInsA                       | Germline            |
| 21       | FANCD2 1360FS*8                              | Somatic             |
| 22       | ARID1A N2131S                                | Somatic             |
| 23       | CCNE amplification                           | Somatic             |
| 24       | PTEN T277K                                   | Somatic             |

**eTable 2A.** Distribution of Cases at Sheba Medical Center and MD Anderson Cancer Center

|                     | Sheba Medical Center | MD Anderson |
|---------------------|----------------------|-------------|
| Genetic Alteration  | 9                    | 15          |
| Family History only | 10                   | 7           |
| ATM loss            | 5                    | 0           |

**eTable 2B.** Univariate Cox Model to Evaluate Risk Effect of DDR-GA vs ATM loss, FH or PH on PFS

|          | HR    | 95% CI of HR |        | P value |
|----------|-------|--------------|--------|---------|
| DDR GA   | 1     | 1            | 1      |         |
| ATM loss | 2.582 | 0.917        | 7.272  | 0.0726  |
| FH       | 3.229 | 1.502        | 6.944  | 0.0027  |
| PH       | 4.602 | 0.979        | 21.627 | 0.0532  |

**eTable 3A.** Log Rank Test to Compare OS Between Subgroups of Patients

| Status           | N  | Event | Median OS<br>(95%CI)(M) | 1-y OS Rate<br>(95%CI) | P-value |
|------------------|----|-------|-------------------------|------------------------|---------|
| All patients     | 46 | 27    | 9.86 ( 7.56 , 16.06 )   | 0.43 ( 0.3 , 0.63 )    |         |
|                  |    |       |                         |                        |         |
| Platin-naïve     | 2  | 0     | NA ( NA , NA )          | 1 ( 1 , 1 )            | 0.0416  |
| Platin-resistant | 10 | 8     | 5.39 ( 3.78 , NA )      | 0.25 ( 0.08 , 0.8 )    | 0.0302  |
| Platin-sensitive | 34 | 19    | 10.48 ( 9.69 , NA )     | 0.47 ( 0.31 , 0.71 )   |         |
| DDR-GA           | 24 | 13    | 10.48 ( 8.8 , NA )      | 0.48 ( 0.3 , 0.77 )    | 0.2761  |
| FH/PH/ATMloss    | 22 | 14    | 9.69 ( 7.52 , NA )      | 0.38 ( 0.2 , 0.7 )     |         |

[Platin- oxaliplatin/ cisplatin; FH-family history, PH- personal history]



**eTable 3B.** Univariate Cox Model to Evaluate Risk Effect of DDR-GA vs ATM loss, HF or PH on PFS

|      |             | HR     | 95% CI of HR |        | p value |
|------|-------------|--------|--------------|--------|---------|
| FXGA | DDR GA      | 1      | 1            | 1      |         |
|      | ATM<br>LOSS | 0.977  | 0.277        | 3.448  | 0.971   |
|      | FH          | 1.528  | 0.65         | 3.591  | 0.3309  |
|      | PH          | 14.058 | 2.423        | 81.576 | 0.0032  |

**eTable 4.** Summary of Adverse Events and Grade

| Toxicity/Grade                      | 1  | 2 | 3 | 4 | 5 |
|-------------------------------------|----|---|---|---|---|
| Anemia                              | 5  | 6 | 5 | 0 | 0 |
| Anorexia                            | 11 | 0 | 0 | 0 | 0 |
| Constipation                        | 8  | 1 | 0 | 0 | 0 |
| Dysgeusia                           | 7  | 0 | 0 | 0 | 0 |
| Fatigue                             | 17 | 5 | 1 | 0 | 0 |
| Gastritis                           | 0  | 1 | 0 | 0 | 0 |
| Gastroesophageal Reflux Disease     | 1  | 0 | 0 | 0 | 0 |
| GGT increased                       | 0  | 1 | 1 | 0 | 0 |
| Hypomagnesemia                      | 2  | 0 | 0 | 0 | 0 |
| Mucositis Oral                      | 5  | 0 | 0 | 0 | 0 |
| Nausea                              | 18 | 4 | 0 | 0 | 0 |
| Neutrophil Count decreased          | 0  | 3 | 0 | 0 | 0 |
| Platelet Count decreased            | 3  | 1 | 0 | 0 | 0 |
| Proteinuria                         | 1  | 0 | 0 | 0 | 0 |
| Pruritus                            | 2  | 0 | 0 | 0 | 0 |
| Thrombotic Thrombocytopenic Purpura | 1  | 0 | 0 | 0 | 0 |
| Vomiting                            | 9  | 0 | 1 | 0 | 0 |
| White Blood Cell decreased          | 6  | 3 | 0 | 0 | 0 |
