# Supplementary material
Source: PubMed Central journal article supplement (PMC7934074)
Supplement: jamaoncol-e210006-s004.pdf [file jamaoncol-e210006-s004.pdf]

## **Data Sharing Statement**

Javle. Phase 2 Study of Olaparib Monotherapy for Previously Treated Pancreatic Cancer With DNA Damage Repair Genetic Alterations Other Than Germline BRCA Variants. *JAMA Oncol.* Published March 04, 2021. doi:10.1001/jamaoncol.2021.0006

### **Data**

**Data available:** No
